# Supplementary material for: The contribution of musculoskeletal factors to physical frailty: a cross-sectional study
Source: Springer Nature journal article supplement (doi:10.1186/s12891-021-04795-4), 2021-11-01
Supplement: MOESM1 [file 19819602]

Boxplot of Femoral Neck BMD

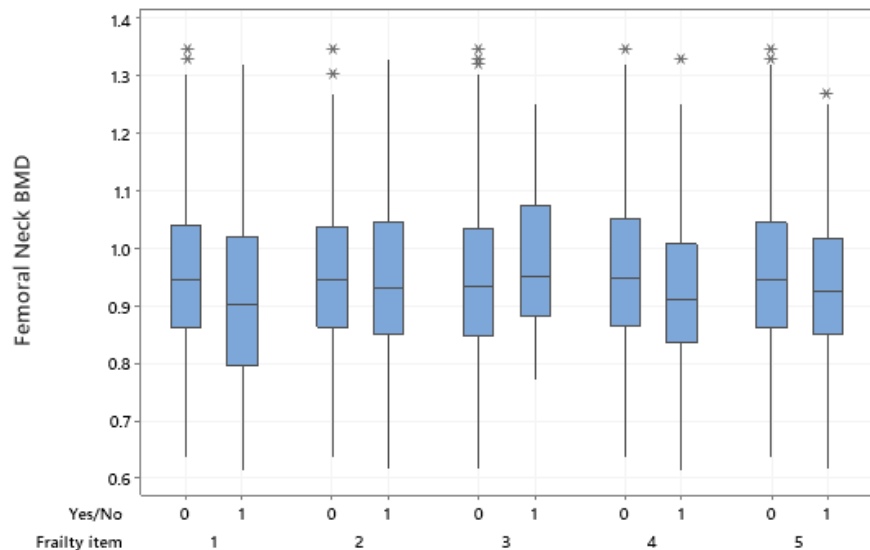

Boxplot of ALMI

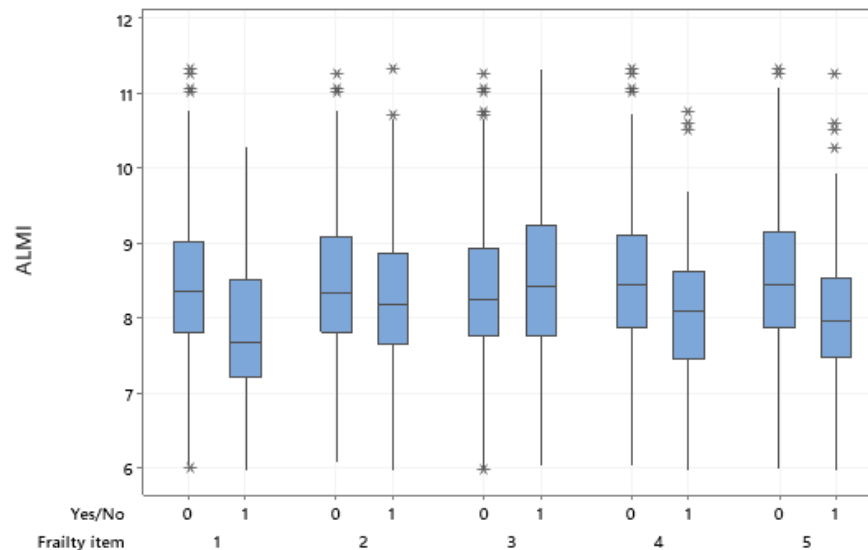

Boxplot of Heel Ultrasound BUA

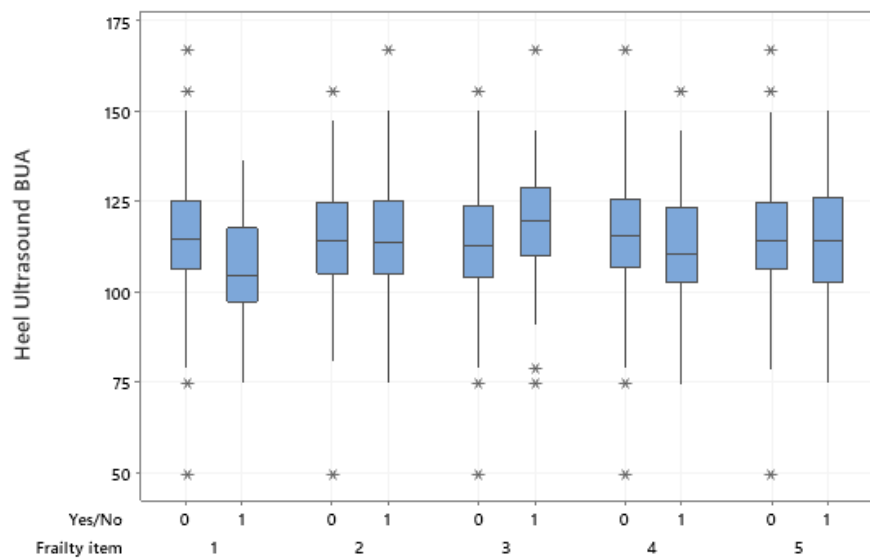

Boxplot of Heel Ultrasound SOS

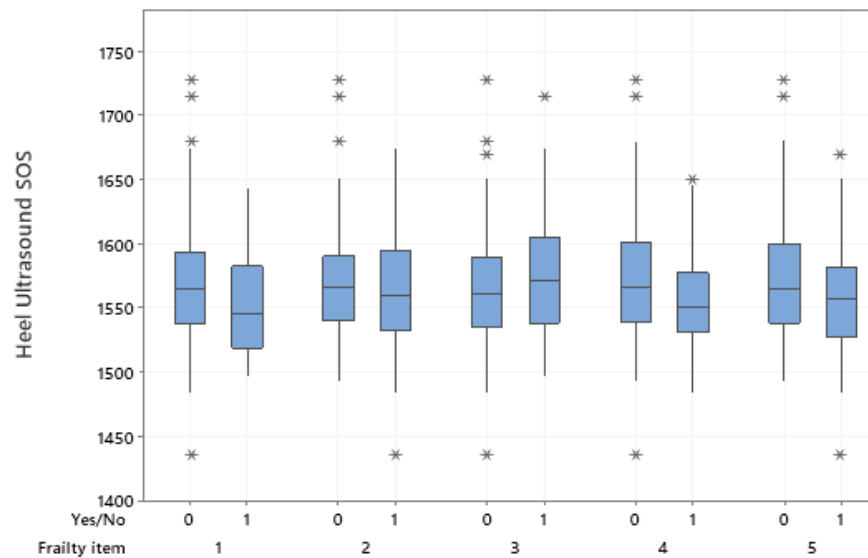

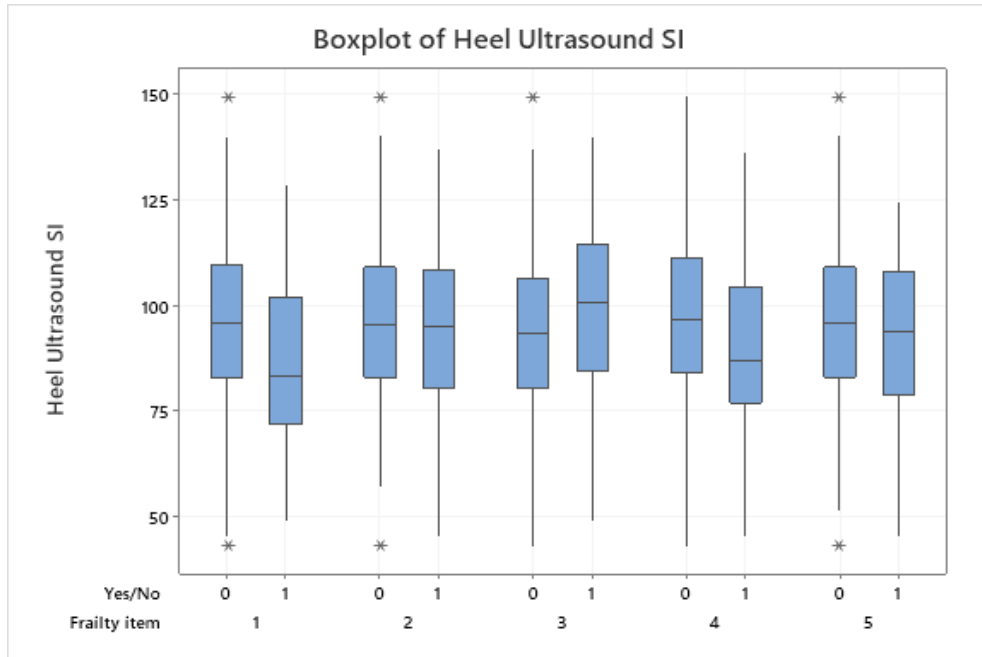

**Supplementary Figure 1** Association between frailty items in the Fried frailty phenotype and musculoskeletal parameters in men.

Frailty items; 1= Low physical activity, 2=fatigue, 3= weight loss, 4= slowness, 5= low handgrip strength

Heel Ultrasound measures; BUA= broadband ultrasound attenuation, SOS= speed of sound, SI= stiffness index

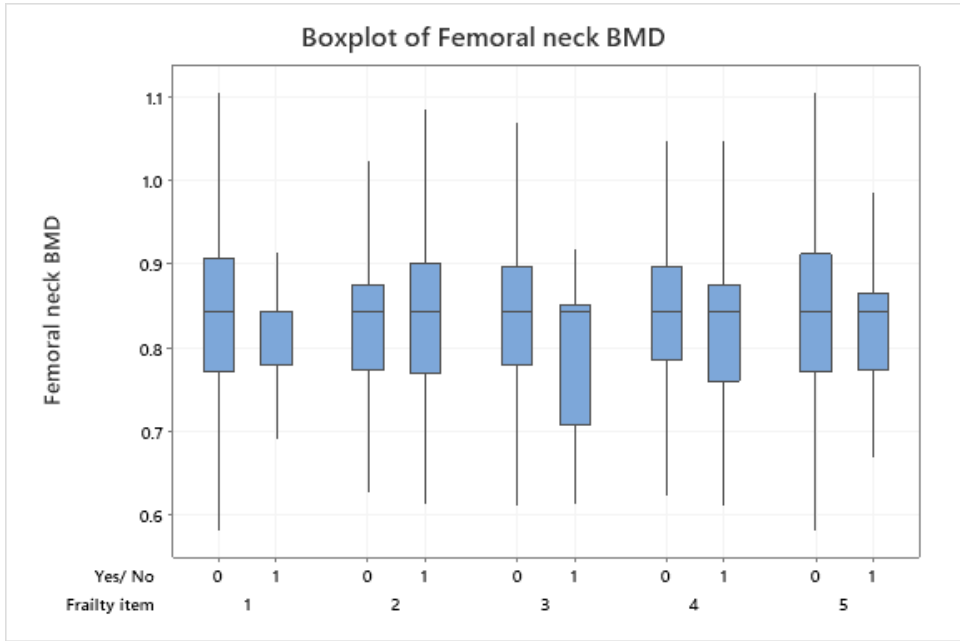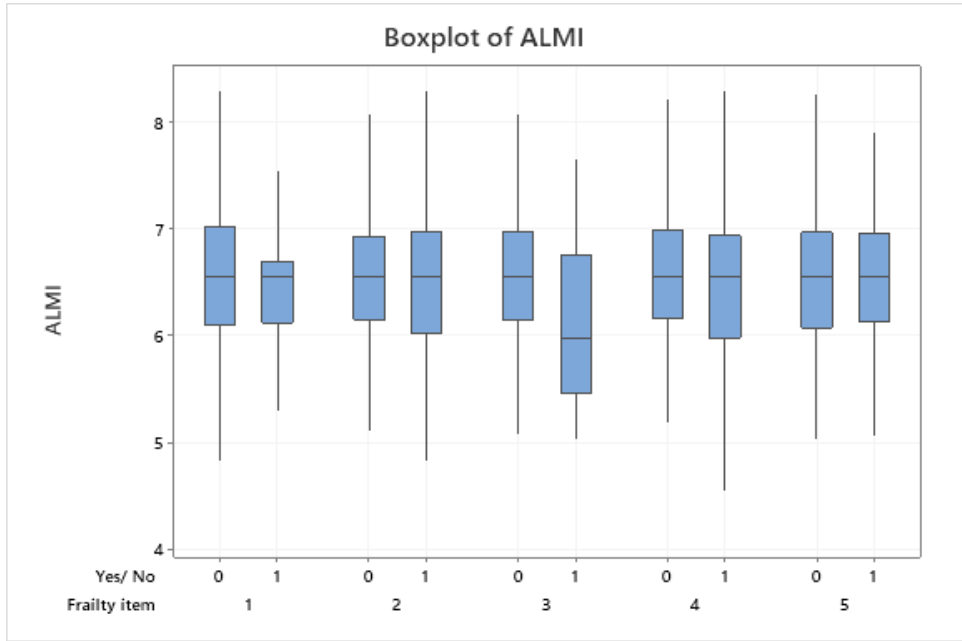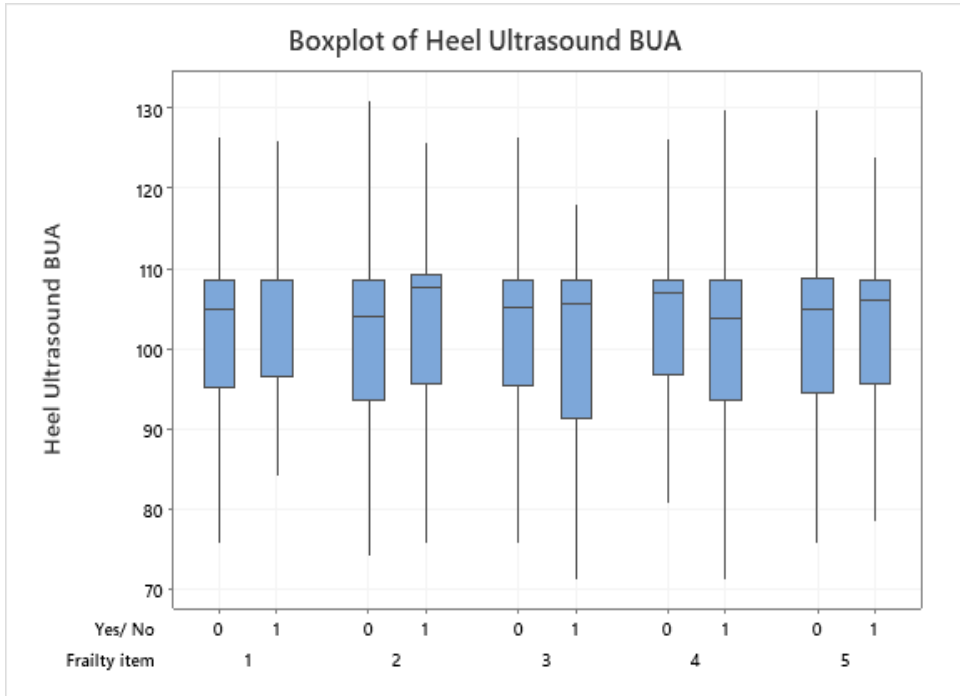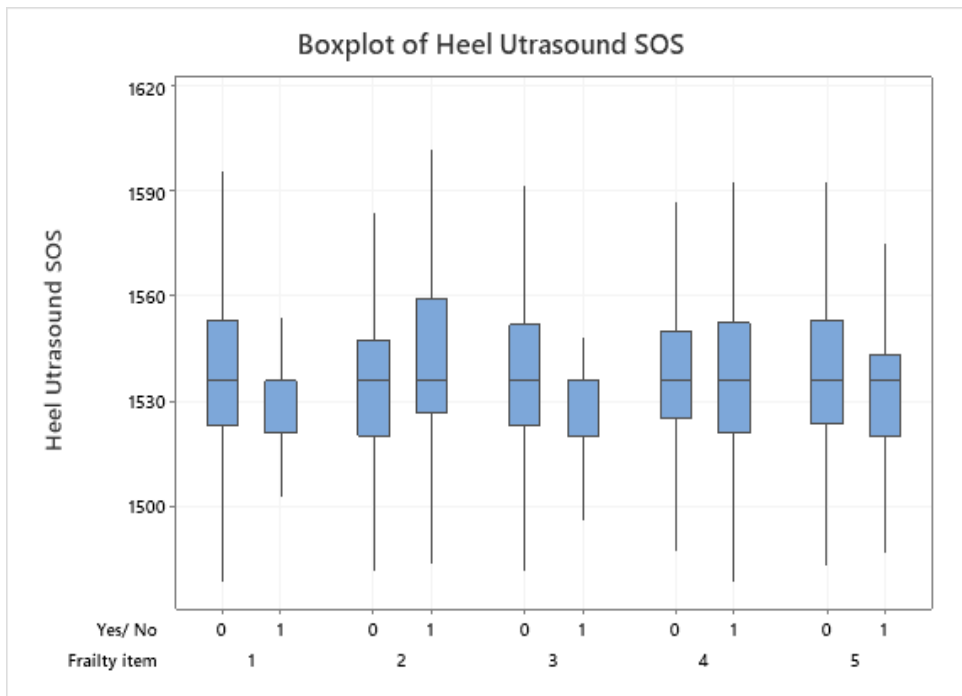

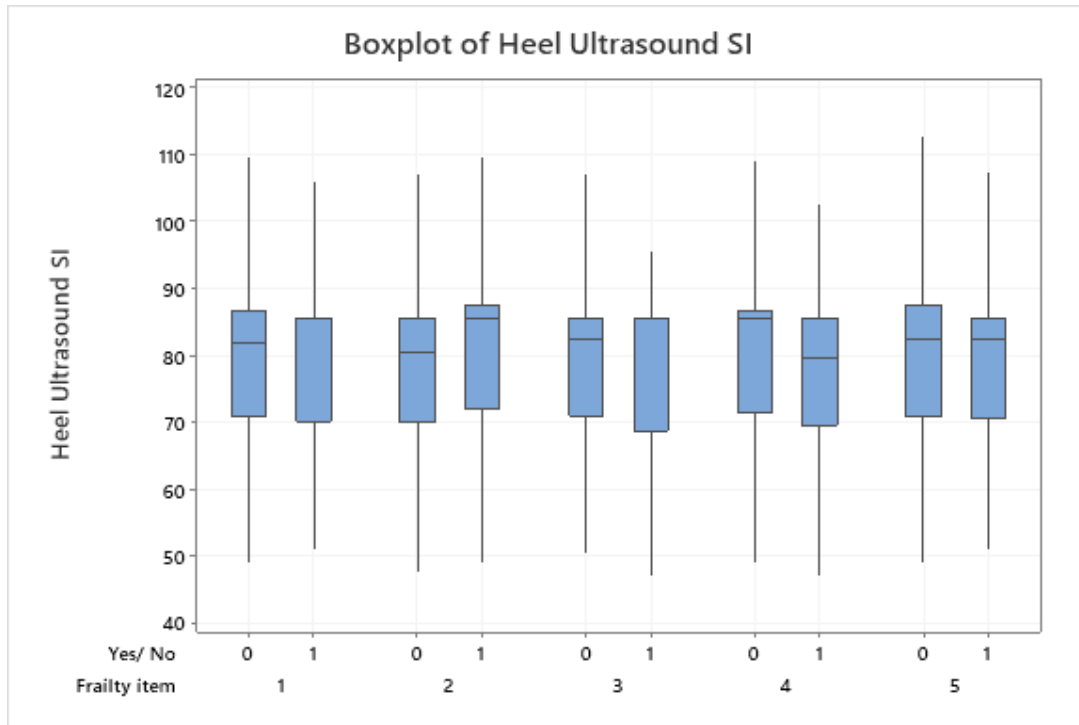

**Supplementary Figure 2** Association between frailty items in the Fried frailty phenotype and musculoskeletal parameters in women.

Frailty items; 1= Low physical activity, 2=fatigue, 3= weight loss, 4= slowness, 5= low handgrip strength

Heel Ultrasound measures; BUA= broadband ultrasound attenuation, SOS= speed of sound, SI= stiffness index

**Supplementary Table 1** Spearman correlation of frailty items with frailty in men

|                       | <b>Frailty</b> | <b>Low physical activity</b> | <b>Weight loss</b> | <b>Fatigue</b> | <b>Slowness</b> |
|-----------------------|----------------|------------------------------|--------------------|----------------|-----------------|
| Low physical activity | 0.460          |                              |                    |                |                 |
| Weight loss           | 0.384          | 0.085                        |                    |                |                 |
| Fatigue               | 0.598          | 0.176                        | 0.273              |                |                 |
| Slowness              | 0.570          | 0.330                        | -0.004             | 0.083          |                 |
| Low HGS*              | 0.547          | 0.250                        | 0.051              | -0.015         | 0.361           |

\*HGS= Handgrip strength

**Supplementary Table 2** Spearman correlation of frailty items with frailty in women

|                       | <b>Frailty</b> | <b>Weight loss</b> | <b>Fatigue</b> | <b>Low physical activity</b> | <b>Slowness</b> |
|-----------------------|----------------|--------------------|----------------|------------------------------|-----------------|
| Weight Loss           | 0.316          |                    |                |                              |                 |
| Fatigue               | 0.554          | 0.204              |                |                              |                 |
| Low physical activity | 0.572          | 0.212              | 0.101          |                              |                 |
| Slowness              | 0.652          | 0.103              | 0.106          | 0.295                        |                 |
| HGS                   | 0.617          | 0.078              | 0.020          | 0.257                        | 0.261           |

## Men Logistic regression models including all covariates

Table 3 Model 1 Femoral BMD

| Covariate        | Odds Ratio | P-value | 95% Confidence Interval |
|------------------|------------|---------|-------------------------|
| Femoral Neck BMD | 0.92       | 0.68    | 0.63-1.34               |
| Age              | 1.05       | 0.009   | 1.01-1.09               |
| BMI              | 1.12       | 0.004   | 1.04-1.22               |
| Fracture         | 2.03       | 0.08    | 0.93-4.46               |
| SES              | 0.90       | 0.80    | 0.39-2.04               |
| Alcohol          | 1.18       | 0.74    | 0.46-3.03               |
| Smoking          | 1.02       | 0.98    | 0.27-3.90               |
| CCI              | 1.25       | 0.79    | 0.26-6.07               |

Table 4 Model 2 BUA

| Covariate | Odds Ratio | P-value | 95% Confidence Interval |
|-----------|------------|---------|-------------------------|
| BUA       | 0.85       | 0.29    | 0.63-1.14               |
| Age       | 1.05       | 0.01    | 1.01-1.09               |
| BMI       | 1.12       | 0.002   | 1.04-1.21               |
| Fracture  | 1.64       | 0.22    | 0.74-3.63               |
| SES       | 0.83       | 0.64    | 0.37-1.85               |
| Alcohol   | 1.11       | 0.83    | 0.43-2.82               |
| Smoking   | 1.01       | 1.00    | 0.27-3.90               |
| CCI       | 1.15       | 0.86    | 0.25-5.40               |

Table 5 Model 3 SI

| Covariate | Odds Ratio | P-value | 95% Confidence Interval |
|-----------|------------|---------|-------------------------|
| SI        | 0.77       | 0.14    | 0.55-1.09               |
| Age       | 1.04       | 0.02    | 1.01-1.08               |
| Weight    | 1.03       | 0.002   | 1.01-1.06               |
| Height    | 0.94       | 0.01    | 0.89-0.99               |
| Fracture  | 1.51       | 0.31    | 0.68-3.34               |
| SES       | 0.88       | 0.77    | 0.39-1.99               |
| Alcohol   | 1.09       | 0.86    | 0.43-2.75               |
| Smoking   | 0.94       | 0.93    | 0.25-3.62               |
| CCI       | 1.23       | 0.80    | 0.26-5.89               |

Table 6 Model 4 SOS

| Covariate | Odds Ratio | P-value | 95% Confidence Interval |
|-----------|------------|---------|-------------------------|
| SOS       | 0.93       | 0.48    | 0.76-1.14               |
| Age       | 1.05       | 0.02    | 1.01-1.08               |
| Weight    | 1.04       | 0.004   | 1.01-1.06               |
| Height    | 0.94       | 0.01    | 0.89-0.99               |
| Fracture  | 1.69       | 0.19    | 0.78-3.68               |
| SES       | 0.85       | 0.70    | 0.38-1.92               |
| Alcohol   | 1.11       | 0.82    | 0.44-2.81               |
| Smoking   | 0.99       | 0.99    | 0.26-3.78               |
| CCI       | 1.22       | 0.81    | 0.252-5.88              |

Table 7 Model 5 ALMI

| Covariate | Odds Ratio | P-value | 95% Confidence Interval |
|-----------|------------|---------|-------------------------|
| ALMI      | 0.46       | 0.000   | 0.32-0.66               |
| Age       | 1.03       | 0.10    | 0.99-1.07               |
| Fracture  | 2.40       | 0.04    | 1.06-5.42               |
| SES       | 0.89       | 0.79    | 0.38-2.07               |
| Alcohol   | 1.01       | 0.99    | 0.38-2.68               |
| Smoking   | 0.67       | 0.58    | 0.17-2.69               |
| CCI       | 2.30       | 0.31    | 0.47-11.30              |
| FMI       | 1.32       | 0.000   | 1.18-1.48               |

Table 8 Model 6 HGS

| Covariate | Odds Ratio | P-value | 95% Confidence Interval |
|-----------|------------|---------|-------------------------|
| HGS       | 0.19       | 0.000   | 0.11-0.32               |
| Age       | 1.00       | 0.83    | 0.96-1.05               |
| Height    | 1.02       | 0.26    | 0.98-1.08               |
| Fracture  | 1.77       | 0.19    | 0.75-4.17               |
| SES       | 0.83       | 0.69    | 0.34-2.04               |
| Alcohol   | 0.98       | 0.96    | 0.36-2.63               |
| Smoking   | 0.76       | 0.73    | 0.17-3.38               |
| CCI       | 2.90       | 0.22    | 0.54-15.65              |

\*\*BMD= Bone mineral density, BMI= Body mass index, SES= Socioeconomic status, CCI= Charlson comorbidity index, BUA=Broadband ultrasound attenuation, SI= Stiffness index, SOS= Speed of sound, ALMI= Appendicular lean mass index, FMI= Fat mass index, HGS= Hand grip strength

## Women Logistic regression models including all covariates

Table 9 Model 1 Femoral BMD

| Covariate        | Odds Ratio | P-value | 95% Confidence Interval |
|------------------|------------|---------|-------------------------|
| Femoral Neck BMD | 0.75       | 0.20    | 0.48-1.17               |
| Age              | 1.10       | 0.000   | 1.05-1.16               |
| BMI              | 1.09       | 0.02    | 1.01-1.18               |
| Fracture         | 1.25       | 0.59    | 0.56-2.79               |
| SES              | 0.84       | 0.68    | 0.36-1.95               |
| Alcohol          | *          | *       | *                       |
| Smoking          | 1.84       | 0.40    | 0.45-7.59               |
| CCI              | 2.2        | 0.55    | 0.17-29.12              |

Table 10 Model 2 BUA

| Covariate | Odds Ratio | P-value | 95% Confidence Interval |
|-----------|------------|---------|-------------------------|
| BUA       | 0.92       | 0.59    | 0.68-1.24               |
| Age       | 1.12       | 0.000   | 1.06-1.18               |
| BMI       | 1.08       | 0.02    | 1.01-1.15               |
| Fracture  | 0.93       | 0.87    | 0.37-2.31               |
| SES       | 1.02       | 0.97    | 0.43-2.39               |
| Alcohol   | *          | *       | *                       |
| Smoking   | 1.95       | 0.35    | 0.48-7.91               |
| CCI       | 5.30       | 0.02    | 1.30-21.56              |

Table 11 Model 3 SI

| Covariate | Odds Ratio | P-value | 95% Confidence Interval |
|-----------|------------|---------|-------------------------|
| SI        | 0.73       | 0.19    | 0.45-1.17               |
| Age       | 1.12       | 0.000   | 1.05-1.17               |
| BMI       | 1.07       | 0.03    | 1.01-1.15               |
| Fracture  | 0.73       | 0.51    | 0.29-1.86               |
| SES       | 0.98       | 0.96    | 0.42-2.30               |
| Alcohol   | *          | *       | *                       |
| Smoking   | 1.76       | 0.43    | 0.44-7.10               |
| CCI       | 3.69       | 0.06    | 0.94-14.49              |



Table 12 Model 4 SOS

| Covariate | Odds Ratio | P-value | 95% Confidence Interval |
|-----------|------------|---------|-------------------------|
| SOS       | 0.81       | 0.15    | 0.60-1.08               |
| Age       | 1.11       | 0.00    | 1.05-1.17               |
| Weight    | 1.03       | 0.03    | 1.00-1.06               |
| Height    | 0.93       | 0.03    | 0.87-0.99               |
| Fracture  | 0.80       | 0.64    | 0.32-2.01               |
| SES       | 1.03       | 0.94    | 0.32-2.01               |
| Alcohol   | *          | *       | *                       |
| Smoking   | 1.71       | 0.46    | 0.41-7.21               |
| CCI       | 5.69       | 0.02    | 1.39-23.32              |

Table 13 Model 5 ALMI

| Covariate | Odds Ratio | P-value | 95% Confidence Interval |
|-----------|------------|---------|-------------------------|
| ALMI      | 0.02       | 0.01    | 0.00-0.42               |
| Age       | 1.13       | 0.000   | 1.07-1.18               |
| Fracture  | 1.04       | 0.92    | 0.47-2.27               |
| SES       | 1.10       | 0.82    | 0.47-2.56               |
| Alcohol   | *          | *       | *                       |
| Smoking   | 2.00       | 0.33    | 0.50-7.96               |
| CCI       | 3.20       | 0.37    | 0.25-40.44              |
| FMI       | 1.16       | 0.005   | 1.04-1.28               |

Table 14 Model 6 HGS

| Covariate | Odds Ratio | P-value | 95% Confidence Interval |
|-----------|------------|---------|-------------------------|
| HGS       | 0.49       | 0.000   | 0.36-0.66               |
| Age       | 1.05       | 0.05    | 1.00-1.09               |
| Height    | 0.96       | 0.14    | 0.90-1.01               |
| Fracture  | 1.00       | 1.00    | 0.47-2.13               |
| SES       | 0.75       | 0.48    | 0.33-1.68               |
| Alcohol   | *          | *       | *                       |
| Smoking   | 0.88       | 0.86    | 0.21-3.66               |
| CCI       | 4.57       | 0.27    | 0.31-68.39              |

\*Denotes not enough data to run analysis

\*\*BMD= Bone mineral density, BMI= Body mass index, SES= Socioeconomic status, CCI= Charlson comorbidity index, BUA=Broadband ultrasound attenuation, SI= Stiffness index, SOS= Speed of sound, ALMI= Appendicular lean mass index, FMI= Fat mass index, HGS= Hand grip strength

## Men Data

### Exposure: ALMI

#### Step 1: The inclusive logistic model is presented.

```
. logistic frailty_dich rALM Age BMI i.Fracture i.SES i.Smoking i.CharlsonComorbidity Fatmassindex, or  
base
```

Logistic regression

Number of obs = 345

LR chi2(13) = 58.97

Prob > chi2 = 0.0000

Log likelihood = -120.19782

Pseudo R2 = 0.1970

| frailty_dich    | Odds ratio | Std. err. | z     | P> z  | [95% conf. interval] |          |
|-----------------|------------|-----------|-------|-------|----------------------|----------|
| ALMI            | .2983879   | .0776547  | -4.65 | 0.000 | .1791671             | .4969404 |
| Age             | 1.030198   | .0202046  | 1.52  | 0.129 | .9913489             | 1.070569 |
| BMI             | 1.373065   | .1594045  | 2.73  | 0.006 | 1.093633             | 1.723893 |
| Fracture        |            |           |       |       |                      |          |
| 0               | 1          | (base)    |       |       |                      |          |
| 1               | 2.394882   | .9984614  | 2.09  | 0.036 | 1.057805             | 5.422038 |
| SES             |            |           |       |       |                      |          |
| 1               | 1          | (base)    |       |       |                      |          |
| 2               | .9545276   | .4167347  | -0.11 | 0.915 | .4056623             | 2.246013 |
| 3               | .4963864   | .197493   | -1.76 | 0.078 | .2275934             | 1.08263  |
| Smoking         |            |           |       |       |                      |          |
| 0               | 1          | (base)    |       |       |                      |          |
| 1               | .8226749   | .5841438  | -0.27 | 0.783 | .2045639             | 3.308473 |
| CharlsonComor~y |            |           |       |       |                      |          |

|              |  |          |          |       |       |          |          |
|--------------|--|----------|----------|-------|-------|----------|----------|
| 0            |  | 1        | (base)   |       |       |          |          |
| 1            |  | .983323  | .4261215 | -0.04 | 0.969 | .4205613 | 2.299127 |
| 2            |  | .6630003 | .3317627 | -0.82 | 0.411 | .2486428 | 1.767875 |
| 3            |  | 1.518698 | 1.028593 | 0.62  | 0.537 | .4026841 | 5.727674 |
| 4            |  | 1.175665 | 1.108821 | 0.17  | 0.864 | .1851309 | 7.46601  |
| 5            |  | .768004  | .9979386 | -0.20 | 0.839 | .0601615 | 9.804114 |
| 6            |  | 1        | (empty)  |       |       |          |          |
| 8            |  | 1        | (empty)  |       |       |          |          |
|              |  |          |          |       |       |          |          |
| Fatmassindex |  | .9517502 | .1209597 | -0.39 | 0.697 | .7418946 | 1.220966 |
| _cons        |  | 2.05e-06 | 6.06e-06 | -4.43 | 0.000 | 6.25e-09 | .0006725 |

---

Note: \_cons estimates baseline odds.

## Step 2: The link test.

```
. linktest, nolog
```

```
Logistic regression
```

```
Number of obs = 345
```

```
LR chi2(2) = 51.55
```

```
Prob > chi2 = 0.0000
```

```
Log likelihood = -123.90637
```

```
Pseudo R2 = 0.1722
```

```
-----+-----
```

| frailty_dich | Coefficient | Std. err. | z     | P> z  | [95% conf. interval] |          |
|--------------|-------------|-----------|-------|-------|----------------------|----------|
| * _hat       | .6437314    | .364733   | 1.76  | 0.078 | -.0711321            | 1.358595 |
| ** _hatsq    | -.1312012   | .1259561  | -1.04 | 0.298 | -.3780707            | .1156683 |
| _cons        | -.1192326   | .2886283  | -0.41 | 0.680 | -.6849336            | .4464685 |

```
-----+-----
```

*\*The linear predicted value has a low p-value indicating an acceptable predictability.*

*\*\*The linear predicted value squared is not significant, indicating no evidence of misspecification.*

## Step 3: Including square and cubic terms into the regression model and performing the joint square and cubic terms test.

```
. logistic frailty_dich rALM Age BMI i.Fracture i.SES i.Alcohol i.Smoking i.CharlsonComorbidity  
Fatmassindex xbhsq_rALM xbhcu_rALM, or base
```

```
. test xbhsq_rALM xbhcu_rALM
```

```
( 1) [frailty_dich]xbhsq_rALM = 0
```

```
( 2) [frailty_dich]xbhcu_rALM = 0
```

```
chi2( 2) = 4.15
```

```
Prob > chi2 = 0.1259 (Non-significant, no evidence of misspecification)
```

**Exposure: SI**

**Step 1.**

```
. logistic frailty_dich SI Age BMI i.Fracture i.SES i.Smoking i.CharlsonComorbidity Fatmassindex, or base
```

Logistic regression

Number of obs = 343

LR chi2(13) = 30.91

Prob > chi2 = 0.0035

Pseudo R2 = 0.1035

Log likelihood = -133.88401

| frailty_dich    | Odds ratio | Std. err. | z     | P> z  | [95% conf. interval] |          |
|-----------------|------------|-----------|-------|-------|----------------------|----------|
| SI              | .7937888   | .1387124  | -1.32 | 0.186 | .5635856             | 1.118021 |
| Age             | 1.044892   | .0194385  | 2.36  | 0.018 | 1.00748              | 1.083694 |
| BMI             | .9884019   | .0811789  | -0.14 | 0.887 | .84144               | 1.161031 |
| Fracture        |            |           |       |       |                      |          |
| 0               | 1          | (base)    |       |       |                      |          |
| 1               | 1.703154   | .7027375  | 1.29  | 0.197 | .7586472             | 3.823558 |
| SES             |            |           |       |       |                      |          |
| 1               | 1          | (base)    |       |       |                      |          |
| 2               | .823384    | .3388971  | -0.47 | 0.637 | .3674988             | 1.844799 |
| 3               | .477382    | .1765616  | -2.00 | 0.046 | .2312309             | .9855672 |
| Smoking         |            |           |       |       |                      |          |
| 0               | 1          | (base)    |       |       |                      |          |
| 1               | .8888654   | .6160963  | -0.17 | 0.865 | .2284786             | 3.458012 |
| CharlsonComor~y |            |           |       |       |                      |          |
| 0               | 1          | (base)    |       |       |                      |          |

|              |  |          |          |       |       |          |          |
|--------------|--|----------|----------|-------|-------|----------|----------|
| 1            |  | .7780867 | .3280084 | -0.60 | 0.552 | .3405631 | 1.7777   |
| 2            |  | .6287387 | .2918881 | -1.00 | 0.318 | .2531076 | 1.561835 |
| 3            |  | 1.131058 | .7230809 | 0.19  | 0.847 | .3230836 | 3.95963  |
| 4            |  | 1.669593 | 1.327067 | 0.64  | 0.519 | .3515906 | 7.928369 |
| 5            |  | .7488349 | .959847  | -0.23 | 0.821 | .0607193 | 9.23518  |
| 6            |  | 1        | (empty)  |       |       |          |          |
| 8            |  | 1        | (empty)  |       |       |          |          |
|              |  |          |          |       |       |          |          |
| Fatmassindex |  | 1.217612 | .135668  | 1.77  | 0.077 | .9787392 | 1.514785 |
| _cons        |  | .0020212 | .0043929 | -2.85 | 0.004 | .0000285 | .1430984 |

-----  
Note: \_cons estimates baseline odds.

## Step 2

```
. linktest, nolog
```

```
Logistic regression
```

```
Number of obs = 343
```

```
LR chi2(2) = 33.62
```

```
Prob > chi2 = 0.0000
```

```
Pseudo R2 = 0.1126
```

```
Log likelihood = -132.52831
```

```
-----+-----  
frailty_dich | Coefficient Std. err. z P>|z| [95% conf. interval]  
-----+-----  
* _hat | .2168663 .521078 0.42 0.677 -.8044279 1.23816  
** _hatsq | -.2874587 .1828032 -1.57 0.116 -.6457465 .070829  
_cons | -.3557897 .3919846 -0.91 0.364 -1.124065 .4124861  
-----+-----
```

*\*The linear predicted value has a ? p-value indicating an acceptable predictability.*

*\*\*The linear predicted value squared is not significant, indicating no evidence of misspecification.*

## Step 3.

```
. logistic frailty_dich SI Age BMI i.Fracture i.SES i.Alcohol i.Smoking i.CharlsonComorbidity  
Fatmassindex xbhsq_SI xbhcu_SI, or base
```

```
. test xbhsq_SI xbhcu_SI
```

```
( 1) [frailty_dich]xbhsq_SI = 0
```

```
( 2) [frailty_dich]xbhcu_SI = 0
```

```
chi2( 2) = 2.61
```

```
Prob > chi2 = 0.2710 (Non-significant, no evidence of misspecification)
```

## Exposure: HGS

### Step 1.

```
. logistic frailty_dich HGS_std Age BMI i.Fracture i.SES i.Alcohol i.Smoking i.CharlsonComorbidity  
Fatmassindex, or base
```

Logistic regression

Number of obs = 344

LR chi2(14) = 85.05

Prob > chi2 = 0.0000

Pseudo R2 = 0.2844

Log likelihood = -106.98399

| frailty_dich | Odds ratio | Std. err. | z     | P> z  | [95% conf. interval] |          |
|--------------|------------|-----------|-------|-------|----------------------|----------|
| HGS_std      | .1204      | .041146   | -6.19 | 0.000 | .0616217             | .2352445 |
| Age          | 1.009655   | .0213531  | 0.45  | 0.650 | .9686593             | 1.052386 |
| BMI          | 1.036798   | .0741246  | 0.51  | 0.613 | .9012365             | 1.192751 |
| Fracture     |            |           |       |       |                      |          |
| 0            | 1          | (base)    |       |       |                      |          |
| 1            | 1.740556   | .7764358  | 1.24  | 0.214 | .726072              | 4.172498 |
| SES          |            |           |       |       |                      |          |
| 1            | 1          | (base)    |       |       |                      |          |
| 2            | .7858692   | .3650619  | -0.52 | 0.604 | .3161836             | 1.953265 |
| 3            | .4020963   | .1699814  | -2.16 | 0.031 | .175588              | .9208    |
| Alcohol      |            |           |       |       |                      |          |
| 0            | 1          | (base)    |       |       |                      |          |
| 1            | 1.072841   | .5483383  | 0.14  | 0.891 | .3939844             | 2.921406 |
| Smoking      |            |           |       |       |                      |          |
| 0            | 1          | (base)    |       |       |                      |          |
| 1            | .9275245   | .7357721  | -0.09 | 0.924 | .1959285             | 4.390896 |



| CharlsonComor~y |  |          |          |       |       |                   |
|-----------------|--|----------|----------|-------|-------|-------------------|
| 0               |  | 1        | (base)   |       |       |                   |
| 1               |  | 1.17331  | .5410034 | 0.35  | 0.729 | .4752599 2.896641 |
| 2               |  | 1.004698 | .5279366 | 0.01  | 0.993 | .3587209 2.813939 |
| 3               |  | 1.155243 | .8552937 | 0.19  | 0.845 | .2706943 4.930233 |
| 4               |  | 2.956017 | 2.784631 | 1.15  | 0.250 | .4665055 18.73083 |
| 5               |  | .5043338 | .6802902 | -0.51 | 0.612 | .0358544 7.09405  |
| 6               |  | 1        | (empty)  |       |       |                   |
| 8               |  | 1        | (empty)  |       |       |                   |
| -----           |  |          |          |       |       |                   |
| Fatmassindex    |  | 1.116072 | .1062991 | 1.15  | 0.249 | .9260201 1.345129 |
| _cons           |  | .0006583 | .0014785 | -3.26 | 0.001 | 8.07e-06 .0537112 |

Note: \_cons estimates baseline odds.

## Step 2.

```
. linktest, nolog
```

```
Logistic regression
```

```
Number of obs = 344
```

```
LR chi2(2) = 85.44
```

```
Prob > chi2 = 0.0000
```

```
Pseudo R2 = 0.2857
```

```
Log likelihood = -106.79109
```

```
-----+-----  
frailty_dich | Coefficient  Std. err.      z    P>|z|     [95% conf. interval]  
-----+-----  
    *_hat |   .8574051   .2671087     3.21  0.001     .3338817    1.380929  
   **_hatsq | -.0534168   .0887053    -0.60  0.547    -.2272759    .1204423  
    _cons |  -.013089   .2298274    -0.06  0.955    -.4635424    .4373645  
-----+-----
```

*\*The linear predicted value has a low p-value indicating an acceptable predictability.*

*\*\*The linear predicted value squared is not significant, indicating no evidence of misspecification.*

## Step 3.

```
. logistic frailty_dich HGS_std Age BMI i.Fracture i.SES i.Smoking i.CharlsonComorbidity Fatmassindex  
xbhsq_HGS xbhcu_HGS, or base
```

```
. test xbhsq_HGS xbhcu_HGS
```

```
( 1)  [frailty_dich]xbhsq_HGS = 0
```

```
( 2)  [frailty_dich]xbhcu_HGS = 0
```

```
chi2( 2) = 2.73
```

```
Prob > chi2 = 0.2553 (Non-significant, no evidence of misspecification)
```

## Women Data

### Exposure: ALMI

#### Step 1.

```
. logistic frailty_dich rALM Age BMI i.Fracture i.SES i.Smoking i.CharlsonComorbidity Fatmassindex, or base
```

Logistic regression

Number of obs = 311

LR chi2(13) = 44.44

Prob > chi2 = 0.0000

Pseudo R2 = 0.1683

Log likelihood = -109.84726

| frailty_dich    | Odds ratio | Std. err. | z     | P> z  | [95% conf. interval] |          |
|-----------------|------------|-----------|-------|-------|----------------------|----------|
| ALMI            | .0032756   | .0088914  | -2.11 | 0.035 | .000016              | .6696394 |
| Age             | 1.126256   | .0282492  | 4.74  | 0.000 | 1.072227             | 1.183007 |
| BMI             | 1.195011   | .2576796  | 0.83  | 0.409 | .7831187             | 1.823543 |
| Fracture        |            |           |       |       |                      |          |
| 0               | 1          | (base)    |       |       |                      |          |
| 1               | .951251    | .3793142  | -0.13 | 0.900 | .4353875             | 2.078329 |
| SES             |            |           |       |       |                      |          |
| 1               | 1          | (base)    |       |       |                      |          |
| 2               | 1.112307   | .4792872  | 0.25  | 0.805 | .4780207             | 2.588231 |
| 3               | 1.180736   | .5723954  | 0.34  | 0.732 | .4565716             | 3.053494 |
| Smoking         |            |           |       |       |                      |          |
| 0               | 1          | (base)    |       |       |                      |          |
| 1               | 1.799923   | 1.299834  | 0.81  | 0.416 | .4370688             | 7.412388 |
| CharlsonComor~y |            |           |       |       |                      |          |
| 0               | 1          | (base)    |       |       |                      |          |

|              |  |          |          |       |       |          |          |
|--------------|--|----------|----------|-------|-------|----------|----------|
| 1            |  | .9460996 | .439805  | -0.12 | 0.905 | .3804051 | 2.35303  |
| 2            |  | 1.116951 | .5642338 | 0.22  | 0.827 | .4149969 | 3.006237 |
| 3            |  | 2.273709 | 1.70004  | 1.10  | 0.272 | .5251656 | 9.844044 |
| 4            |  | 3.39875  | 4.381638 | 0.95  | 0.343 | .2716175 | 42.52856 |
| 5            |  | 5.283059 | 7.930614 | 1.11  | 0.268 | .2786841 | 100.1518 |
|              |  |          |          |       |       |          |          |
| Fatmassindex |  | .9619163 | .224255  | -0.17 | 0.868 | .609107  | 1.519081 |
| _cons        |  | 3.53e-07 | 1.29e-06 | -4.07 | 0.000 | 2.78e-10 | .0004478 |

-----  
Note: \_cons estimates baseline odds.

## Step 2.

```
. linktest, nolog
```

```
Logistic regression
```

```
Number of obs = 311
```

```
LR chi2(2) = 44.45
```

```
Prob > chi2 = 0.0000
```

```
Pseudo R2 = 0.1683
```

```
Log likelihood = -109.84515
```

```
-----+-----  
frailty_dich | Coefficient  Std. err.      z    P>|z|     [95% conf. interval]  
-----+-----  
      *_hat |    1.023776   .4031116    2.54   0.011    .2336915    1.81386  
     **_hatsq |   .0082841   .1274166    0.07   0.948   -.241448    .2580161  
      _cons |   .0081902   .3187208    0.03   0.979   -.6164911    .6328715  
-----+-----
```

*\*The linear predicted value has a low p-value indicating an acceptable predictability.*

*\*\*The linear predicted value squared is not significant, indicating no evidence of misspecification.*

## Step 3.

```
. logistic frailty_dich rALM Age BMI i.Fracture i.SES i.Smoking i.CharlsonComorbidity Fatmassindex  
xbhsq_rALM xbhcu_rALM, or base
```

```
. test xbhsq_rALM xbhcu_rALM
```

```
( 1) [frailty_dich]xbhsq_rALM = 0
```

```
( 2) [frailty_dich]xbhcu_rALM = 0
```

```
chi2( 2) = 1.67
```

```
Prob > chi2 = 0.4337 (Non-significant, no evidence of misspecification)
```

## Exposure: HGS

### Step 1.

logistic frailty\_dich SDunitsHGS Age BMI Height i.Fracture i.SES i.Smoking i.CharlsonComorbidity  
Fatmassindex, or base

Logistic regression

Number of obs = 319

LR chi2(14) = 61.16

Prob > chi2 = 0.0000

Pseudo R2 = 0.2208

Log likelihood = -107.93872

| frailty_dich    | Odds ratio | Std. err. | z     | P> z  | [95% conf. interval] |
|-----------------|------------|-----------|-------|-------|----------------------|
| SDunitsHGS      | .4854853   | .0760159  | -4.62 | 0.000 | .3571885 .6598644    |
| Age             | 1.071296   | .0270878  | 2.72  | 0.006 | 1.019499 1.125724    |
| BMI             | 1.075025   | .0436194  | 1.78  | 0.075 | .9928432 1.164008    |
| Height          | .966749    | .0305275  | -1.07 | 0.284 | .9087301 1.028472    |
| Fracture        |            |           |       |       |                      |
| 0               | 1          | (base)    |       |       |                      |
| 1               | .9696297   | .3929142  | -0.08 | 0.939 | .4382089 2.14551     |
| SES             |            |           |       |       |                      |
| 1               | 1          | (base)    |       |       |                      |
| 2               | .8676334   | .3738528  | -0.33 | 0.742 | .3728755 2.018872    |
| 3               | .9938547   | .4908102  | -0.01 | 0.990 | .3775385 2.616282    |
| Smoking         |            |           |       |       |                      |
| 0               | 1          | (base)    |       |       |                      |
| 1               | 1.180606   | .8879975  | 0.22  | 0.825 | .2703153 5.156316    |
| CharlsonComor~y |            |           |       |       |                      |
| 0               | 1          | (base)    |       |       |                      |

|              |  |          |          |       |       |          |          |
|--------------|--|----------|----------|-------|-------|----------|----------|
| 1            |  | .8316095 | .3878905 | -0.40 | 0.693 | .3333424 | 2.074667 |
| 2            |  | .9029777 | .4660296 | -0.20 | 0.843 | .3283744 | 2.483046 |
| 3            |  | 3.060282 | 2.317286 | 1.48  | 0.140 | .6937778 | 13.49903 |
| 4            |  | 3.816273 | 5.798852 | 0.88  | 0.378 | .1941928 | 74.99734 |
| 5            |  | 2.635381 | 3.903227 | 0.65  | 0.513 | .1445906 | 48.03376 |
|              |  |          |          |       |       |          |          |
| Fatmassindex |  | .9835912 | .0468997 | -0.35 | 0.729 | .8958341 | 1.079945 |
| _cons        |  | .3646237 | 2.179019 | -0.17 | 0.866 | 2.99e-06 | 44533.81 |

-----  
Note: \_cons estimates baseline odds.

## Step 2.

```
. linktest, nolog
```

```
Logistic regression
```

```
Number of obs = 274
```

```
LR chi2(2) = 35.46
```

```
Prob > chi2 = 0.0000
```

```
Pseudo R2 = 0.1533
```

```
Log likelihood = -97.920926
```

```
-----+-----  
frailty_dich | Coefficient Std. err. z P>|z| [95% conf. interval]  
-----+-----  
* _hat | .7894532 .388664 2.03 0.042 .0276858 1.551221  
** _hatsq | -.0785075 .1320186 -0.59 0.552 -.3372592 .1802442  
_cons | -.0685285 .341574 -0.20 0.841 -.7380013 .6009442  
-----+-----
```

*\*The linear predicted value has a low p-value indicating an acceptable predictability.*

*\*\*The linear predicted value squared is not significant, indicating no evidence of misspecification.*

## Step 3.

```
. logistic frailty_dich SDunitsHGS Age BMI Height i.Fracture i.SES i.Smoking i.CharlsonComorbidity  
Fatmassindex xbhsq_HGS xbhcu_HGS, or base
```

```
. test xbhsq_HGS xbhcu_HGS
```

```
( 1) [frailty_dich]xbhsq_HGS = 0
```

```
( 2) [frailty_dich]xbhcu_HGS = 0
```

```
chi2( 2) = 0.69
```

```
Prob > chi2 = 0.7097 (Non-significant, no evidence of misspecification)
```
